# Supplementary material for: Placental multi-omics integration identifies candidate functional genes for birthweight
Source: PubMed Central journal article supplement (PMC9061712; doi:10.1038/s41467-022-30007-1), 2022-05-02
Supplement: 41467_2022_30007_MOESM5_ESM.pdf [file 41467_2022_30007_MOESM5_ESM.pdf]

## Reporting Summary

Nature Portfolio wishes to improve the reproducibility of the work that we publish. This form provides structure for consistency and transparency in reporting. For further information on Nature Portfolio policies, see our [Editorial Policies](#) and the [Editorial Policy Checklist](#).

### Statistics

For all statistical analyses, confirm that the following items are present in the figure legend, table legend, main text, or Methods section.

n/a Confirmed

- The exact sample size ( $n$ ) for each experimental group/condition, given as a discrete number and unit of measurement
- A statement on whether measurements were taken from distinct samples or whether the same sample was measured repeatedly
- The statistical test(s) used AND whether they are one- or two-sided  
*Only common tests should be described solely by name; describe more complex techniques in the Methods section.*
- A description of all covariates tested
- A description of any assumptions or corrections, such as tests of normality and adjustment for multiple comparisons
- A full description of the statistical parameters including central tendency (e.g. means) or other basic estimates (e.g. regression coefficient) AND variation (e.g. standard deviation) or associated estimates of uncertainty (e.g. confidence intervals)
- For null hypothesis testing, the test statistic (e.g.  $F$ ,  $t$ ,  $r$ ) with confidence intervals, effect sizes, degrees of freedom and  $P$  value noted  
*Give  $P$  values as exact values whenever suitable.*
- For Bayesian analysis, information on the choice of priors and Markov chain Monte Carlo settings
- For hierarchical and complex designs, identification of the appropriate level for tests and full reporting of outcomes
- Estimates of effect sizes (e.g. Cohen's  $d$ , Pearson's  $r$ ), indicating how they were calculated

*Our web collection on [statistics for biologists](#) contains articles on many of the points above.*

### Software and code

Policy information about [availability of computer code](#)

Data collection

No custom software used.

Data analysis

QTLtools v1.3.1, CIT v2.2, TwoSampleMR v0.5.6, moloc v0.1.0, Ingenuity Pathway Analysis -March 2020 Release, FUMA v1.3.6a, minifi R v1.4, eFORGE v2.0

For manuscripts utilizing custom algorithms or software that are central to the research but not yet described in published literature, software must be made available to editors and reviewers. We strongly encourage code deposition in a community repository (e.g. GitHub). See the Nature Portfolio [guidelines for submitting code & software](#) for further information.

### Data

Policy information about [availability of data](#)

All manuscripts must include a [data availability statement](#). This statement should provide the following information, where applicable:

- Accession codes, unique identifiers, or web links for publicly available datasets
- A description of any restrictions on data availability
- For clinical datasets or third party data, please ensure that the statement adheres to our [policy](#)

The genotypes, DNA methylation, and gene expression data used in this study from the NICHD Fetal Growth Studies have been deposited in the dbGaP database under accession code phs001717.v1.p1 (<https://www.ncbi.nlm.nih.gov/gap/?term=phs001717.v1.p1>). The genotypes and gene expression data from the Rhode Island Child Health Study (RICHS) have been deposited in the dbGaP database under accession code phs001586.v1.p1 ([https://www.ncbi.nlm.nih.gov/projects/gap/cgi-bin/study.cgi?study\\_id=phs001586.v1.p1](https://www.ncbi.nlm.nih.gov/projects/gap/cgi-bin/study.cgi?study_id=phs001586.v1.p1)).

GWAS summary statistics for birthweight are available via the EGG website (<https://egg-consortium.org/>). The 1000 Genomes Reference Panel datasets are

available at <https://www.internationalgenome.org/category/reference/>. The human genome reference is made accessible by the Genome Reference Consortium at [https://www.ncbi.nlm.nih.gov/assembly/GCF\\_000001405.13/](https://www.ncbi.nlm.nih.gov/assembly/GCF_000001405.13/). GTEx eQTL data are accessible via the GTEx Portal at <https://gtexportal.org/home/eqtlDashboardPage>. ARIES mQTL database is available for download at <http://www.mqtl.db.org/>. Genotype imputation platform as well as the Haplotype Reference Consortium reference panel can be accessed via the Michigan Imputation Server at <https://imputationserver.readthedocs.io/en/latest/>. The catalog of epigenome-wide association studies can be accessed at <http://ewascatalog.org/>. Regulatory feature annotations of CpG sites are accessible from ENCODE and Roadmap Epigenomics projects at <https://www.encodeproject.org/> and <http://www.roadmapepigenomics.org/data/>. Functional mapping of SNPs and genes via FUMA is accessible at <https://fuma.ctglab.nl/>.

## Field-specific reporting

Please select the one below that is the best fit for your research. If you are not sure, read the appropriate sections before making your selection.

Life sciences  Behavioural & social sciences  Ecological, evolutionary & environmental sciences

For a reference copy of the document with all sections, see [nature.com/documents/nr-reporting-summary-flat.pdf](https://www.nature.com/documents/nr-reporting-summary-flat.pdf)

## Life sciences study design

All studies must disclose on these points even when the disclosure is negative.

|                 |                                                                                                                                                                                                                                                                                                                                                                                                                                                                                                                                                                                                                                                                                                                       |
|-----------------|-----------------------------------------------------------------------------------------------------------------------------------------------------------------------------------------------------------------------------------------------------------------------------------------------------------------------------------------------------------------------------------------------------------------------------------------------------------------------------------------------------------------------------------------------------------------------------------------------------------------------------------------------------------------------------------------------------------------------|
| Sample size     | The sample sizes for both the discovery and replication datasets were larger than recommended samples by GTEx, and in most QTL studies in humans, adequately identifying mQTLs and eQTLs in cis.                                                                                                                                                                                                                                                                                                                                                                                                                                                                                                                      |
| Data exclusions | In the NICHD Fetal Growth Studies, low-risk pregnant women were enrolled. Exclusions included pregnant women who reported having major medical condition (cancer, autoimmune disease, diabetes, HIV or AIDS, chronic renal disease and psychiatric disorder). Prior to analysis, samples were excluded based on a pre-established quality control implemented on the genetic and molecular data to minimize bias introduced by technical artifacts. Exclusions include: discrepancies between phenotypic sex and genotypic sex, outliers from the distribution of the samples' genetic clusters based on multi-dimensional scaling plots, and a mismatching sample identifier.                                        |
| Replication     | Reproducibility was assessed through interrogation of different analysis methods and using an independent dataset. Analysis using an independent dataset has validated several findings in the discovery dataset. Some findings were not validated (these include the co-localized loci FES, CTDNEP1, PRMT7 that were validated in RICHs mQTL but not eQTL) either because they were not found in the analytic dataset of the replication cohort or did not pass statistical test, potentially due to cohort-related differences such as environmental exposures.                                                                                                                                                     |
| Randomization   | Following the baseline interview, women were randomized to 1 of 4 ultrasonography schedules. By design, this mixed longitudinal randomization scheme captured weekly fetal growth data without exposing women to weekly ultrasound examinations. All women received upto five ultrasonography schedules throughout pregnancy, hence the randomization is unlikely to result in differences in the primary outcome (fetal growth). During analysis, Mendelian randomization analyses was conducted, assuming that genotype is randomly assigned at conception, hence birthweight was evaluated with DNA methylation, and gene expression in placenta randomized in the infants as described in the manuscript Methods. |
| Blinding        | This is an observational study, hence no blinding was needed.                                                                                                                                                                                                                                                                                                                                                                                                                                                                                                                                                                                                                                                         |

## Reporting for specific materials, systems and methods

We require information from authors about some types of materials, experimental systems and methods used in many studies. Here, indicate whether each material, system or method listed is relevant to your study. If you are not sure if a list item applies to your research, read the appropriate section before selecting a response.

### Materials & experimental systems

| n/a                                 | Involved in the study                                           |
|-------------------------------------|-----------------------------------------------------------------|
| <input checked="" type="checkbox"/> | <input type="checkbox"/> Antibodies                             |
| <input checked="" type="checkbox"/> | <input type="checkbox"/> Eukaryotic cell lines                  |
| <input checked="" type="checkbox"/> | <input type="checkbox"/> Palaeontology and archaeology          |
| <input checked="" type="checkbox"/> | <input type="checkbox"/> Animals and other organisms            |
| <input type="checkbox"/>            | <input checked="" type="checkbox"/> Human research participants |
| <input type="checkbox"/>            | <input checked="" type="checkbox"/> Clinical data               |
| <input checked="" type="checkbox"/> | <input type="checkbox"/> Dual use research of concern           |

### Methods

| n/a                                 | Involved in the study                           |
|-------------------------------------|-------------------------------------------------|
| <input checked="" type="checkbox"/> | <input type="checkbox"/> ChIP-seq               |
| <input checked="" type="checkbox"/> | <input type="checkbox"/> Flow cytometry         |
| <input checked="" type="checkbox"/> | <input type="checkbox"/> MRI-based neuroimaging |

## Human research participants

Policy information about [studies involving human research participants](#)

|                            |                                                                                                                                                                                                                                                                                                                                                                                                                                                                                                                                                                                                                                                                                                                                                                                                                                              |
|----------------------------|----------------------------------------------------------------------------------------------------------------------------------------------------------------------------------------------------------------------------------------------------------------------------------------------------------------------------------------------------------------------------------------------------------------------------------------------------------------------------------------------------------------------------------------------------------------------------------------------------------------------------------------------------------------------------------------------------------------------------------------------------------------------------------------------------------------------------------------------|
| Population characteristics | The study population is composed of low-risk pregnant women from the US with mean age 27.5 years; self-identified Hispanic (n=97), White (n=74), Black (n=71), and Asian (n=49) ethnicity; equal proportion of male and female fetuses.                                                                                                                                                                                                                                                                                                                                                                                                                                                                                                                                                                                                      |
| Recruitment                | The NICHD Fetal Growth Studies samples were recruited from 10 clinical sites in the US. Women with low-risk for adverse pregnancy complications were recruited from four race/ethnic groups to develop a fetal growth chart. Exclusions were applied to women with autoimmune diseases, chronic hypertension, diabetes, chronic renal disease, cancer, HIV/AIDS, or psychiatric disorders. The distribution of birthweight, placental DNA methylation and gene expression in the cohort may reflect this low-risk cohort selection. However, the allele frequency distribution of common SNPs known to be associated with birthweight is unlikely to be affected by the cohort selection criteria, hence the observed association of the SNPs with the traits is likely to be transferable (with some potential differences in effect size). |
| Ethics oversight           | The NICHD Fetal Growth study protocol was approved by the institutional review boards of NICHD and each of the participating clinic sites, namely, Columbia University, New York; New York Hospital, Queens, New York; Christiana Care Health System, Delaware; Saint Peter's University Hospital, New Jersey; Medical University of South Carolina, South Carolina; University of Alabama, Alabama; Northwestern University, Illinois; Long Beach Memorial Medical Center, California; University of California, Irvine, California; Fountain Valley Hospital, California; Women and Infants Hospital of Rhode Island, Rhode Island; and Tufts University, Massachusetts. Written informed consent was obtained from all study participants.                                                                                                |

Note that full information on the approval of the study protocol must also be provided in the manuscript.

## Clinical data

Policy information about [clinical studies](#)

All manuscripts should comply with the ICMJE [guidelines for publication of clinical research](#) and a completed [CONSORT checklist](#) must be included with all submissions.

|                             |                                                                                                                                                                                                                                                                                                                                                                                                                                                                                                                                                                                                                                                                                                                                                                                                                      |
|-----------------------------|----------------------------------------------------------------------------------------------------------------------------------------------------------------------------------------------------------------------------------------------------------------------------------------------------------------------------------------------------------------------------------------------------------------------------------------------------------------------------------------------------------------------------------------------------------------------------------------------------------------------------------------------------------------------------------------------------------------------------------------------------------------------------------------------------------------------|
| Clinical trial registration | ClinicalTrials.gov, NCT00912132                                                                                                                                                                                                                                                                                                                                                                                                                                                                                                                                                                                                                                                                                                                                                                                      |
| Study protocol              | <a href="https://clinicaltrials.gov/ct2/show/NCT00912132">https://clinicaltrials.gov/ct2/show/NCT00912132</a>                                                                                                                                                                                                                                                                                                                                                                                                                                                                                                                                                                                                                                                                                                        |
| Data collection             | Data collection of the NICHD Fetal Growth Studies Singletons was done from July 2009 to January 2013. Singleton pregnant women were recruited at 12 participating US clinical sites and followed through pregnancy: Columbia University (NY), New York Hospital, Queens (NY), Christiana Care Health System (DE), Saint Peter's University Hospital (NJ), Medical University of South Carolina (SC), University of Alabama (AL), Northwestern University (IL), Long Beach Memorial Medical Center (CA), University of California, Irvine (CA), Fountain Valley Hospital (CA), Women and Infants Hospital of Rhode Island (RI) and Tufts University (MA).                                                                                                                                                             |
| Outcomes                    | Primary outcome in NICHD Fetal Growth Studies was fetal growth trajectory, create an individualized standard for fetal growth, and improve accuracy of fetal growth estimation. Fetal growth trajectories were created using 2-D ultrasound fetal biometry. Secondary outcomes include: constructing standards for fundal height, gestational diabetes mellitus (GDM) measured using clinical protocol and its association with fetal growth, impact of maternal obesity on fetal growth, collecting placental tissues and cord blood to study intrauterine growth restriction, collecting dietary intake data to study the association between maternal nutrition and fetal growth (as described in <a href="https://clinicaltrials.gov/ct2/show/NCT00912132">https://clinicaltrials.gov/ct2/show/NCT00912132</a> ) |
